1 **Mutational signatures in countries affected by SARS-CoV-2: Implications in host-**  
2 **pathogen interactome**

3

4 J. Singh , H. Singh, S E. Hasnain, S.A. Rahman

5

6

7

8

9 **Keywords:** Signature Amino Acid Mutations, Mutational Hotspots, Antigenic drift, COVID-  
10 19, SARS-CoV-2

11

12

13

14

15 Running Title: Signature mutations in SARS-CoV-2.

16

17 **Abstract**

18

19 We are in the midst of the third severe coronavirus outbreak caused by SARS-CoV-2 with  
20 unprecedented health and socio-economic consequences due to the COVID-19. Globally, the  
21 major thrust of scientific efforts has shifted to the design of potent vaccine and anti-viral  
22 candidates. Earlier genome analyses have shown global dominance of some mutations  
23 purportedly indicative of similar infectivity and transmissibility of SARS-CoV-2 worldwide.  
24 Using high-quality large dataset of 25k whole-genome sequences, we show emergence of new  
25 cluster of mutations as result of geographic evolution of SARS-CoV-2 in local population  
26 ( $\geq 10\%$ ) of different nations. Using statistical analysis, we observe that these mutations have  
27 either significantly co-occurred in globally dominant strains or have shown mutual exclusivity  
28 in other cases. These mutations potentially modulate structural stability of proteins, some of  
29 which forms part of SARS-CoV-2-human interactome. The high confidence druggable host  
30 proteins are also up-regulated during SARS-CoV-2 infection. Mutations occurring in potential  
31 hot-spot regions within likely T-cell and B-cell epitopes or in proteins as part of host-viral  
32 interactome, could hamper vaccine or drug efficacy in local population. Overall, our study  
33 provides comprehensive view of emerging geo-clonal mutations which would aid researchers  
34 to understand and develop effective countermeasures in the current crisis.

35

36 **Significance**

37

38 Our comparative analysis of globally dominant mutations and region-specific mutations in 25k  
39 SARS-CoV-2 genomes elucidates its geo-clonal evolution. We observe locally dominant  
40 mutations (co-occurring or mutually exclusive) in nations with contrasting COVID-19  
41 mortalities per million of population) besides globally dominant ones namely, P314L (ORF1b)  
42 and D164G (S) type. We also see exclusive dominant mutations such as in Brazil (I33T in  
43 ORF6 and I292T in N protein), England (G251V in ORF3a), India (T2016K and L3606F in  
44 ORF1a) and in Spain (L84S in ORF8). The emergence of these local mutations in ORFs within  
45 SARS-CoV-2 genome could have interventional implications and also points towards their  
46 potential in modulating infectivity of SARS-CoV-2 in regional population.

47

48

49

## 50 **Introduction**

51

52 The rapid spread of SARS-CoV-2 has created an unprecedented global crisis. The evolving  
53 SARS-CoV-2 viral variants have shown dominance (present in >50% genomes) of some  
54 mutations indicating their concurrent emergence worldwide. However, co-dominance of  
55 geographically distinct mutations may hamper global vaccine development and  
56 pharmacological interventions. The genome organization of the 29kb SARS-CoV-2 (1)  
57 involves 12 Open Reading Frames (ORF) encoding for ORF1a and 1b, surface glycoprotein -  
58 Spike (S), ORF3a, envelope (E), membrane (M), ORF6, ORF7a and 7b, ORF8, nucleocapsid  
59 (N) proteins and ORF10 (2,3). Our earlier phylogenetic analysis of >250 SARS-CoV-2 isolates  
60 showed clustering of clinical samples in multiple clades derived from the molecular divergence  
61 in ORF1ab/1b, S and ORF8 proteins (4). Subsequent analysis of isolates sequenced in India  
62 showed higher mutational frequency in ORF1a from Indian samples (n=25) compared to global  
63 isolates (n=3932) (5). This prompted us to look for similar dominant mutations, concurrent or  
64 unique, present both globally and unique to nations with higher COVID-19 incidence namely  
65 Brazil, India, Italy, Spain, UK and USA and compare it to countries where incidence was low,  
66 Australia, Germany, Republic of Congo and Saudi Arabia. Here, we provide a comprehensive  
67 report on the evolution of local clusters of mutations explored in a large dataset of >25k  
68 genomes (whole genome sequences) from multiple geographical locations around the globe  
69 and their co-occurrence or exclusivity with common global mutations. We further ascertained  
70 effects of these mutations on the structural stability in the corresponding proteins, some of  
71 which interact with host proteins, which were shown to be upregulated in patients with severe  
72 COVID-19 symptoms. Identification of such mutations may further aid researchers in  
73 developing broad spectrum vaccines or understanding variability in drug efficacy.

74

## 75 **Methods**

76

77 High quality, full length whole genome sequences of clinical isolates of SARS-CoV-2 were  
78 downloaded from Global Initiative on Sharing All Influenza Data (Table 1) (GISAID;  
79 <https://www.gisaid.org>) (23). Glimmer was used for gene prediction (ORFs), and ORF  
80 sequences with Ns were masked out and were not considered for protein translation (24).  
81 Throughout, site numbering and genome structure are given using Wuhan-Hu-1  
82 (NC\_045512.2) as reference genome ([https://www.ncbi.nlm.nih.gov/nuccore/NC\\_045512](https://www.ncbi.nlm.nih.gov/nuccore/NC_045512)).

83 MAFFT was used for ORF alignment and mutations were computed using BioInception's in-  
84 house pipeline based on R (<https://cran.r-project.org/>) and Python. Alignment regions with  
85 >25% gaps against the reference genome were ruled out for amino acid mutational changes.  
86 The change or mutation ratio for an ORF alignment is computed by the presence of a mutation  
87 divided by total number of sequences in the alignment. This ratio is changed into a percentage.  
88 Analysis of co-occurring or exclusive mutations (number of times two mutation occur together  
89 in a clinical genome) across various ORFs was defined in terms of log-odds ratio (with p-value  
90 and standard error) where a positive ratio indicates co-occurring mutations and negative value  
91 denotes an exclusive mutation in the significant part of population using statsmodel  
92 (Supplementary Data Sheet 1) (25). Structural effects of mutations on protein conformation,  
93 flexibility and stability were predicted using DynaMut (26). The structural models were  
94 retrieved from i-tasser COVID-19 database (27).

95

## 96 **Results**

97

### 98 **Mutations occurring globally in $\geq 25\%$ of the population**

99

100 Here, we report recurrent occurrence of (i) global and (ii) local (region specific) non-  
101 synonymous mutations present in >25K SARS-CoV-2 clinical isolates (Table 1). To achieve  
102 better signal-to-noise ratio, we have used a double layered protocol to identify statistically  
103 significant signature mutations. In general, recurrent or dominant mutations occurring in  $\geq 10\%$   
104 of the functional genome (ORFs), compared to Wuhan\_HU-1 (NC\_045512), were classified  
105 into mutually exclusive or co-occurring (mutations which also have the propensity to exist  
106 together with another mutation). These were defined using log-odds ratio (LOR) where a  
107 positive or negative log-odds value represents co-occurring and mutually exclusive mutations,  
108 respectively. Vibrational entropy changes were predicted for both wild type and mutant  
109 proteins for evaluating the impact of mutations on conformation, flexibility and stability of  
110 proteins. The SARS-CoV-2 proteome can be classified into ORF1a, ORF1b (or ORF1ab joint),  
111 S, E, ORF7a, ORF7b, N, ORF8 and ORF 10. ORF1a and ORF1b code for polyproteins which  
112 are further cleaved to non-structural proteins (nsp), necessary for infection and replication of  
113 virus. Our analysis revealed high propensity mutations present in the ORF1a and 1b, S, ORF3a,  
114 ORF6, ORF8 and N proteins of SARS-CoV-2 (Figure 1, Supplementary Table 1). Our findings  
115 agree with earlier reports on global co-occurrence of P314L (70.97%) and D614G (71.57%)  
116 mutations in ORF1b (corresponding to P323L in nsp12) and S proteins, respectively.

117 Subsequently, high occurrence of mutation Q57H (25.54%) in ORF3a protein, R203K  
118 (24.34%) and G204R (24.29%) in N protein (Supplementary Table 1) was globally reported.  
119 They were also found to be widely accumulated in North American and European populations  
120 (6).

121

## 122 **A comparative study between region specific mutations and globally dominant mutations**

123

124 By capturing the most prominent mutations present in samples (through application of a coarse  
125 data filter for mutations present in >25% of samples), our hierarchical (ward based) clustering  
126 analysis of regional isolates placed European nations (except Spain and Scotland) and Brazil  
127 into one cluster and Australia, India, Saudi Arabia, Scotland, Spain, USA, and DRC into  
128 another cluster (Figure 2). Brazil and India, however, do not cluster with the rest of populations  
129 and seem to possess distinct signature mutations, indicating early signs of genetic drift. In  
130 isolates obtained from populations with the incidence of over a hundred mortalities per million  
131 e.g. Italy, England, Wales, we observed positive log-odds ratio amongst mutations P314L-  
132 D614G (LOR: 10.75, p-value 0.0) and R203K-G204R (LOR: 14.39, p-value 4.089e-146).  
133 Interestingly Germany and Italy (with contrasting mortalities per million of population) (7)  
134 show similar mutation signatures in their genomes. However, in relatively high viral burden  
135 populations such as in Spain, we observed mutually exclusive presence of L84S (ORF8)  
136 mutation along with globally occurring mutations P314L (ORF1b) and D614G (S) (Figure 1).  
137 Whereas in the USA, T265I (ORF1a) and Q57H (ORF3a) were highly concurrent with P314L-  
138 D614G mutations. The globally dominant P314L, D614G and Q57H were predicted to be  
139 stabilizing mutations for nsp12, S and ORF3a proteins, respectively (Table 2). Similarly, other  
140 mutations were predicted to confer mild stabilization or destabilization effects on respective  
141 proteins ( $\Delta\Delta G$  -0.64 to 0.46 kcal.mol<sup>-1</sup>) (Table 2).

142

143 Specific (present only in the particular region within the cut-off limit) mutations - L3606F  
144 (corresponding to L37F in nsp6) (30.96%) and T2016K (corresponding to T1198K in nsp3)  
145 (26.61%) both in ORF1a, A88V (corresponding to A97V in nsp6) (25.67%) in ORF1b and  
146 P13L (31.24%) in Nucleoprotein (N protein) were present in Indian isolates and did not co-  
147 occur with P314L, D614G type (Supplementary Table 1, Supplementary Data Sheet 1). The  
148 outlier Indian samples could be attributed to these mutations which can account for an entirely  
149 separate Indian clade. Though the L3606F mutation also occurs in  $\leq$  25% of isolates from  
150 Australia, DRC, England and Wales, the P13L, T2016K mutant strains seem to have newly co-

151 evolved with L3606F variants in later stages of transmission in India. Brazil, another outlier,  
152 has two distinct mutations I33T (52.53%) in ORF6 and I292T (59.6%) in N protein which were  
153 absent in other nations. These co-occurred with P314L and D614G unlike the Indian exclusive  
154 mutations L3606F, T2016K and P13L which did not co-occur. The Brazilian exclusive  
155 mutations I33T and I292T co-occurred with P314L, D614G, R203K and G204R. It is also  
156 worth noting that within the N protein, the Indian and Brazilian isolates show different country  
157 specific mutations - P13L and I292T mutations, respectively. Stability analysis on these  
158 mutations predicted induction of significant and contrasting conformational changes in N  
159 protein. The P13L mutation was predicted to induce high stabilization ( $\Delta\Delta G$  2.25 kcal.mol<sup>-1</sup>)  
160 owing to hydrophobic interactions of mutated Leu with Ala152 (Supplementary Figure 1). On  
161 the contrary, the I292T (exclusive in Brazil) was predicted to destabilize N protein ( $\Delta\Delta G$  -1.99  
162 kcal.mol<sup>-1</sup>). The destabilization was observed due to changes in weak H-bond interactions in  
163 the vicinity of T292 (Supplementary Figure 2).

164

#### 165 **Mutations occurring in more than 10% of population**

166

167 While prominent mutations (by applying a coarse data filter for mutations present in >25% of  
168 samples) yielded specific mutations in isolates from India, Brazil, USA and Spain, further  
169 reducing the cut-off to  $\geq 10\%$  showed additional country specific signature mutations in  
170 different ORFs (Figure 3). Geographically defined genomic evolution is expected. In United  
171 Kingdom, country specific mutations were observed in England, Wales, Northern Ireland and  
172 Scotland. Mutations in England (G251V in ORF3a), Wales (G392D, A876T in ORF1a; S193I  
173 in N protein), Scotland (S194L in N protein) and Northern Ireland (P2144L and T3579I in  
174 ORF1a) displayed mutual exclusivity (negative LOR) with P314L, D614G and R203K, G204R  
175 mutations. Interestingly in England, the G251V mutation was highly concurrent with L3606F  
176 mutation of nsp6. Contrarily in Wales, the G392D, A876T and S193I mutations (which have  
177 high propensity to co-occur together, showed mutual exclusivity with the L3606F mutation  
178 (Supplementary Data Sheet 1). The P2144L and T3579I mutations showed a high propensity  
179 to co-occur in Northern Ireland population. Distribution of co-occurring and exclusive  
180 mutations in United Kingdom clearly shows G392D, A876T, S193I for Wales and P2144L,  
181 T3579I as specific for Northern Ireland, distinct from England.

182

183 Antigenic drift is believed to occur due to immune pressure resulting in selection of viruses  
184 that can escape, hence exploring mutations will aid towards vaccine design and development

185 (8). Virus circulating in humans undergo antigenic drift, thus necessitating periodic updates to  
186 the virus strains contained in the seasonal vaccine to maintain a good match with circulating  
187 viruses (9) (10). In general, variations in the virus can lead to reduced efficacy and narrow  
188 protection from most vaccinations. The mutating strains might weaken the memory B cells that  
189 have the capacity to generate and improve antibody response to new infection. A correlation  
190 of the occurrence of hotspot mutations within potential T cell and B cell epitopes revealed that  
191 F3071Y and L3606F (ORF1a) are within the epitope regions predicted for both CD4+ and  
192 CD8+ T cell activity (11). The R203K and G204R from N protein have a strong propensity for  
193 B cell epitopes.

194

## 195 **Discussion**

196

197 The viral mutation rates (12) are important for understanding the tractability of using variable  
198 regions as vaccine candidates and how virus populations will respond to the application of a  
199 mutagen (13). Bioinformatics and computational biology can assist in the discovery of  
200 conserved epitopes through sequence variability analysis (14). This is particularly relevant  
201 when dealing with virus capable of evading the immune system due to their high mutation  
202 rates. These approaches, combined with experimental evolution and deeper mechanistic  
203 studies, will aid in the understanding of whether mutation rates are likely to change in the  
204 future. While our observations on geographical distribution of mutations could indicate  
205 significant public health outcomes, these also raises fundamental questions on the likely basis  
206 for emergence of such mutations as a function of geography. A number of factors such as  
207 differences in the microbiome population in a given region, drug pressure, and host genetics  
208 could be attributed. In separate studies on various human infecting viruses, it has been shown  
209 that commensal microbiome can prime the viral infections in hosts (15). The ongoing long and  
210 short term evolutions in the microbiome may further add complexity to our understanding of  
211 host shaped viral adaptations (16). Drug selection pressures can also work at regional and sub-  
212 regional levels (17,18). Analysis of mutation rates are equally crucial in terms of protein-  
213 protein interactions within coronavirus ORFeome and host-pathogen interaction interface. In  
214 SARS-CoV, nsp2, nsp8 (both part of ORF1ab) and ORF9b were shown to interact with other  
215 viral proteins (19). For instance, nsp8 (part of ORF1ab) showed prominent interactions with  
216 replicase proteins including nsp2, nsp5, nsp6, nsp7, nsp9, nsp12, nsp13 and nsp14 (all part of  
217 ORF1ab), indicating crucial role of intra-viral protein-protein interactions in replication  
218 machinery. The mutations in ORFs could be equally crucial in terms of host-viral interactome.

219 Shen Bo *et. al.* (20) classified severity of COVID-19 on the basis of differential expression of  
220 93 serum proteins and 204 metabolite signatures, highlighting immune and metabolic  
221 dysregulation in COVID-19 patients.

222

223 Another study by Gordon *et. al.* (21) identified physical interactions of host (human) proteins  
224 with SARS-CoV-2. Protein-protein interactome (PPI) analysis yielded 332 high confidence  
225 druggable human proteins which are involved in protein trafficking, transcription-translation  
226 and ubiquitination regulation. We observed three common proteins in these studies (20,21)  
227 which are both high confidence druggable targets and dysregulated between healthy and severe  
228 COVID-19 symptoms. Two of these proteins; CD antigen CD155 and gamma-Glu-X  
229 carboxypeptidase were shown to interact with ORF8, while the other glycoprotein GP36b with  
230 nsp7. These proteins are involved in immune regulation and other metabolic processes (22).  
231 These studies present likely evidence that mutations in these ORFs interacting druggable host  
232 proteins could perturb host-pathogen interactome, host immune responses or modulate  
233 therapeutic efficacy of anti-viral agents. The conspicuous distribution of co-occurring or  
234 exclusive mutations in the non-structural proteins; ORF1ab, ORF3a, ORF8 and N proteins of  
235 SARS-CoV-2 could be indicative of one or more of the following: a) Perturbations within  
236 SARS-CoV-2 proteome; b) Human-SARS-CoV-2 interactome or, c) Alteration of  
237 pharmacological profile of either known, or newly designed anti-viral candidates.

238

239 The current work highlights specific mutations in the functional genome of SARS-CoV-2  
240 occurring worldwide and evolution of SARS-CoV-2 across different regions. While earlier  
241 reports have suggested the dominance of P314L and D614G subtype, we show additional  
242 dominance of other exclusive mutations in various countries like India, England Spain, and  
243 Brazil (Figure 1, 2). While the exact role of such mutations in conferring disease phenotype  
244 still needs to be deciphered, the proposed structural-mutation correlations for some of these  
245 mutations point toward their role in governing functional genome pathogenicity of SAR-CoV-  
246 2. The mutually dependent or exclusive role of these crucial mutations in global isolates is  
247 indicative of clonal geo-distribution, which may affect infectivity of SARS-CoV-2 in localized  
248 population. The identification of potential signature mutations in the evolving SARS-CoV-2  
249 genome will aid the development of vaccines, drugs and diagnostics.

250

251



## 252 Author Contributions

253 SEH and SAR designed this research; SAR, JS and HS performed research; SEH, SAR, JS and  
254 HS analysed data; and JS, SAR and HS wrote the paper. The authors declare no competing  
255 interest.

## 256 Acknowledgements

257 SEH is a JC Bose National Fellow, Department of Science and Technology, Government of  
258 India and Robert Koch Fellow, Robert Koch Institute, Berlin. JS acknowledges fellowship  
259 support under Young Scientist and HS under Women Scientist Schemes of Dept. of Health  
260 Research, India. The authors acknowledge that BioInception and Envirozyme Biotech provided  
261 the genomic data analysis and discovery platform. We would like to thank Dr. Sergio M.  
262 Cuesta (Cancer Research UK Cambridge Institute, University of Cambridge) and other  
263 anonymous reviewers for their critical review of this manuscript.

264

265

## 266 References

267

- 268 1. Coronaviridae Study Group of the International Committee on Taxonomy of, V.  
269 (2020) The species Severe acute respiratory syndrome-related coronavirus: classifying  
270 2019-nCoV and naming it SARS-CoV-2. *Nature microbiology*, **5**, 536-544.
- 271 2. Sironi, M., Hasnain, S.E., Rosenthal, B., Phan, T., Luciani, F., Shaw, M.A., Sallum,  
272 M.A., Mirhashemi, M.E., Morand, S., Gonzalez-Candelas, F. *et al.* (2020) SARS-  
273 CoV-2 and COVID-19: A genetic, epidemiological, and evolutionary perspective.  
274 *Infect Genet Evol*, **84**, 104384.
- 275 3. Andersen, K.G., Rambaut, A., Lipkin, W.I., Holmes, E.C. and Garry, R.F. (2020) The  
276 proximal origin of SARS-CoV-2. *Nature medicine*, **26**, 450-452.
- 277 4. Sheikh, J.A., Singh, J., Singh, H., Jamal, S., Khubaib, M., Kohli, S., Dobrindt, U.,  
278 Rahman, S.A., Ehtesham, N.Z. and Hasnain, S.E. (2020) Emerging genetic diversity  
279 among clinical isolates of SARS-CoV-2: Lessons for today. *Infection, genetics and  
280 evolution : journal of molecular epidemiology and evolutionary genetics in infectious  
281 diseases*, **84**, 104330.
- 282 5. Singh, H., Singh, J., Khubaib, M., Jamal, S., Sheikh, J.A., Kohli, S., Hasnain, S.E.  
283 and Rahman, S.A. (2020) Mapping the genomic landscape & diversity of COVID-19  
284 based on >3950 clinical isolates of SARS-CoV-2: Likely origin & transmission  
285 dynamics of isolates sequenced in India. *Indian J Med Res*, **Epub ahead of print**,  
286 **May 30**.
- 287 6. Coppee, F., Lechien, J.R., Decleves, A.E., Tafforeau, L. and Saussez, S. (2020)  
288 Severe acute respiratory syndrome coronavirus 2: virus mutations in specific  
289 European populations. *New Microbes New Infect*, **36**, 100696.
- 290 7. IHME. (2020) Institute for Health Metrics and Evaluation (IHME). COVID-19  
291 Hospital Needs, Infections, Testing, and Death Projections. Seattle, United States of  
292 America: Institute for Health Metrics and Evaluation (IHME), University of  
293 Washington.

- 294 8. Boni, M.F. (2008) Vaccination and antigenic drift in influenza. *Vaccine*, **26 Suppl 3**,  
295 C8-14.
- 296 9. DeDiego, M.L., Anderson, C.S., Yang, H., Holden-Wiltse, J., Fitzgerald, T., Treanor,  
297 J.J. and Topham, D.J. (2016) Directed selection of influenza virus produces antigenic  
298 variants that match circulating human virus isolates and escape from vaccine-  
299 mediated immune protection. *Immunology*, **148**, 160-173.
- 300 10. Smith, D.J., Lapedes, A.S., de Jong, J.C., Bestebroer, T.M., Rimmelzwaan, G.F.,  
301 Osterhaus, A.D. and Fouchier, R.A. (2004) Mapping the antigenic and genetic  
302 evolution of influenza virus. *Science*, **305**, 371-376.
- 303 11. Alba Grifoni, J.S., Yun Zhang, Richard H. Scheuermann, Bjoern Peters, Alessandro  
304 Sette. (2020) A Sequence Homology and Bioinformatic Approach Can Predict  
305 Candidate Targets for Immune Responses to SARS-CoV-2. *Cell Host & Microbe*, **27**,  
306 671-680.
- 307 12. Peck, K.M. and Lauring, A.S. (2018) Complexities of Viral Mutation Rates. *J Virol*,  
308 **92**.
- 309 13. Graham, R.L., Becker, M.M., Eckerle, L.D., Bolles, M., Denison, M.R. and Baric,  
310 R.S. (2012) A live, impaired-fidelity coronavirus vaccine protects in an aged,  
311 immunocompromised mouse model of lethal disease. *Nature medicine*, **18**, 1820-  
312 1826.
- 313 14. Vita, R., Mahajan, S., Overton, J.A., Dhanda, S.K., Martini, S., Cantrell, J.R.,  
314 Wheeler, D.K., Sette, A. and Peters, B. (2019) The Immune Epitope Database  
315 (IEDB): 2018 update. *Nucleic Acids Res*, **47**, D339-D343.
- 316 15. Robinson, C.M. and Pfeiffer, J.K. (2014) Viruses and the Microbiota. *Annual review*  
317 *of virology*, **1**, 55-69.
- 318 16. Garud, N.R., Good, B.H., Hallatschek, O. and Pollard, K.S. (2019) Evolutionary  
319 dynamics of bacteria in the gut microbiome within and across hosts. *PLoS biology*,  
320 **17**, e3000102.
- 321 17. Potdar, V.A., Dakhve, M.R., Kulkarni, P.B., Tikhe, S.A., Broor, S., Gunashekar,  
322 P., Chawla-Sarkar, M., Abraham, A., Bishwas, D., Patil, K.N. *et al.* (2014) Antiviral  
323 drug profile of human influenza A & B viruses circulating in India: 2004-2011. *Indian*  
324 *J Med Res*, **140**, 244-251.
- 325 18. Raman, J., Sharp, B., Kleinschmidt, I., Roper, C., Streat, E., Kelly, V. and Barnes,  
326 K.I. (2008) Differential effect of regional drug pressure on dihydrofolate reductase  
327 and dihydropteroate synthetase mutations in southern Mozambique. *The American*  
328 *journal of tropical medicine and hygiene*, **78**, 256-261.
- 329 19. von Brunn, A., Teepe, C., Simpson, J.C., Pepperkok, R., Friedel, C.C., Zimmer, R.,  
330 Roberts, R., Baric, R. and Haas, J. (2007) Analysis of intraviral protein-protein  
331 interactions of the SARS coronavirus ORF3. *PloS one*, **2**, e459.
- 332 20. Shen, B., Yi, X., Sun, Y., Bi, X., Du, J., Zhang, C., Quan, S., Zhang, F., Sun, R.,  
333 Qian, L. *et al.* (2020) Proteomic and Metabolomic Characterization of COVID-19  
334 Patient Sera. *Cell*.
- 335 21. Gordon, D.E., Jang, G.M., Bouhaddou, M., Xu, J., Obernier, K., O'Meara, M.J., Guo,  
336 J.Z., Swaney, D.L., Tummino, T.A., Huttenhain, R. *et al.* (2020) A SARS-CoV-2-  
337 Human Protein-Protein Interaction Map Reveals Drug Targets and Potential Drug-  
338 Repurposing. *bioRxiv : the preprint server for biology*.
- 339 22. Gao, J., Zheng, Q., Xin, N., Wang, W. and Zhao, C. (2017) CD155, an onco-  
340 immunologic molecule in human tumors. *Cancer science*, **108**, 1934-1938.
- 341 23. Shu, Y. and McCauley, J. (2017) GISAID: Global initiative on sharing all influenza  
342 data - from vision to reality. *Euro surveillance : bulletin European sur les maladies*  
343 *transmissibles = European communicable disease bulletin*, **22**.

- 344 24. Delcher, A.L., Bratke, K.A., Powers, E.C. and Salzberg, S.L. (2007) Identifying  
345 bacterial genes and endosymbiont DNA with Glimmer. *Bioinformatics*, **23**, 673-679.  
346 25. Seabold, S. and Perktold, J. (2010) statsmodels: Econometric and statistical modeling  
347 with python. *Python in Science Conference*, **9th**.  
348 26. Rodrigues, C.H., Pires, D.E. and Ascher, D.B. (2018) DynaMut: predicting the impact  
349 of mutations on protein conformation, flexibility and stability. *Nucleic Acids Res*, **46**,  
350 W350-W355.  
351 27. Yang, J., Yan, R., Roy, A., Xu, D., Poisson, J. and Zhang, Y. (2015) The I-TASSER  
352 Suite: protein structure and function prediction. *Nature methods*, **12**, 7-8.  
353  
354

355 **Figure 1**

356

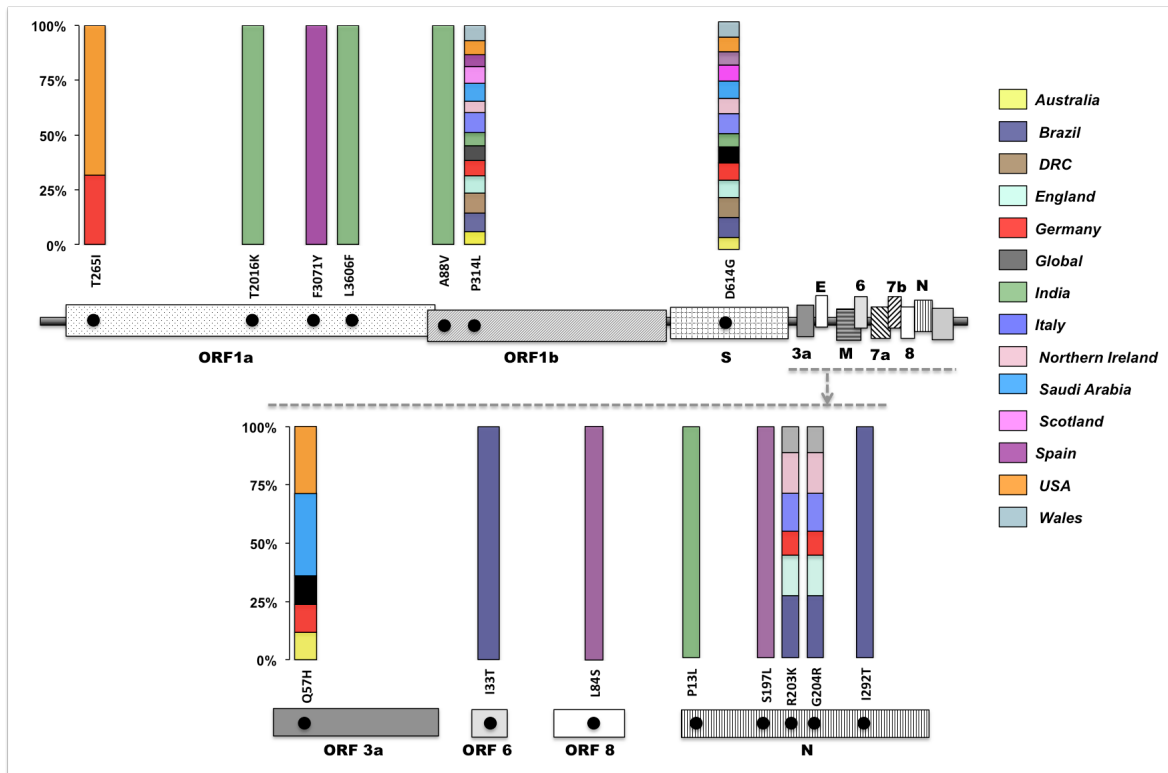

357

358

359 **Figure 1. Mutation analysis of ORF's predicted for 25K SARS-CoV-2 genomes.** Position  
 360 of mutations present in  $\geq 25\%$  of genome samples in different ORF's along with stacked percent  
 361 occupancy of these mutations. Single stacked occupancy highlights mutations specifically  
 362 observed in samples from respective nations. e.g. T2016K, L3606F (ORF1a) and P13L in N  
 363 protein are specifically observed in the Indian Isolates while F3071Y (ORF1a) and L84S  
 364 (ORF8) are observed in Spain.

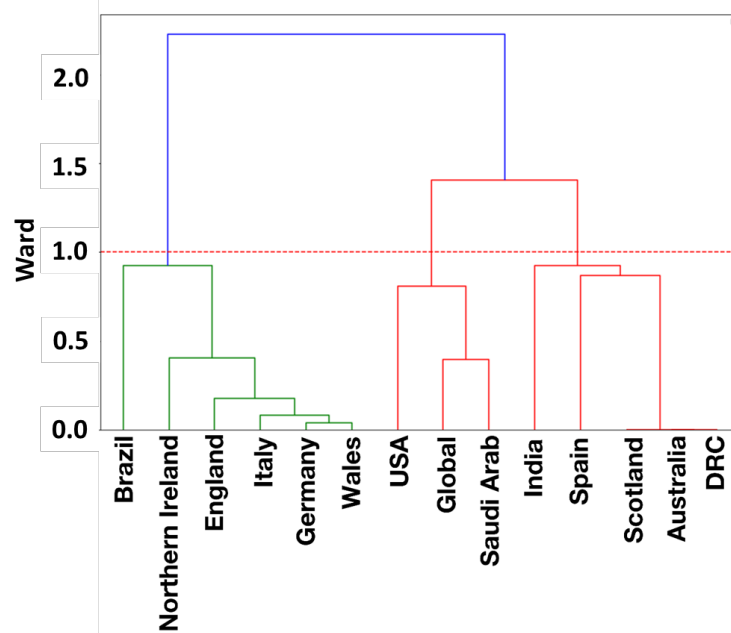

365

366

367 **Figure 2.** Hierarchical (Ward) Clustering of regional isolates based on propensity (present in  
368  $\geq 25\%$  of samples) of mutations to co-occur or be mutually exclusive. Two major groups can  
369 be observed based on co-occurring and mutually exclusive mutations. India and Brazil  
370 segregate from both groups owing to some country specific mutations.

371

372

373

374

375

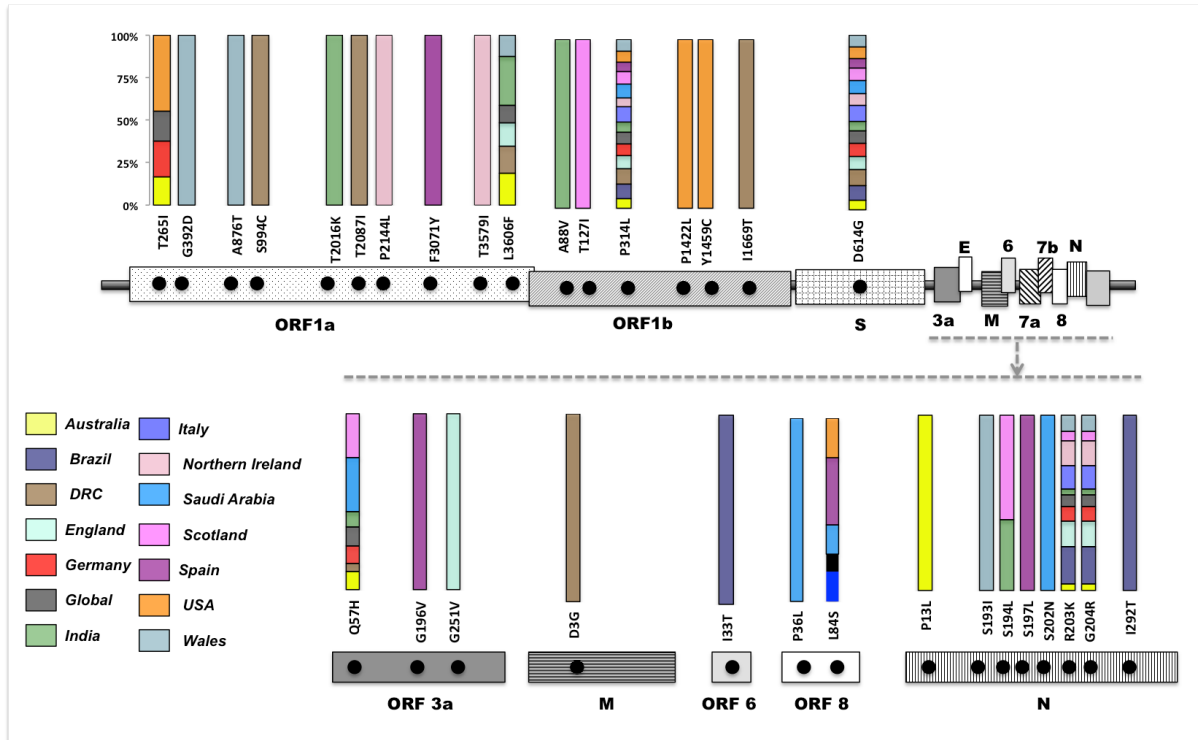

376  
377  
378  
379  
380  
381  
382

**Figure 3.** Position of mutations present in  $\geq 10\%$  (including the  $>25\%$  mutations as depicted in Figure 1a) of genome samples in different ORFs along with stacked percent occupancy of these mutations. Single stacked occupancy highlights mutations specifically observed in samples from respective nations.

383

384 **Table 1:** Distribution of ORFs (amino acid sequences) in SARS-CoV-2 genomes used in this  
385 study. The start and end positions for respective ORFs were taken on the basis of gene  
386 coordinates of reference genome NC\_045512.

| <b>ORF</b> | <b>Start</b> | <b>End</b> | <b>Number of Sequences</b> |
|------------|--------------|------------|----------------------------|
| <b>1a</b>  | 266          | 13468      | 22650                      |
| <b>1b</b>  | 13468        | 21555      | 19827                      |
| <b>S</b>   | 21563        | 25384      | 21757                      |
| <b>3a</b>  | 25393        | 26220      | 25066                      |
| <b>E</b>   | 26245        | 26472      | 25329                      |
| <b>M</b>   | 26523        | 27191      | 25211                      |
| <b>6</b>   | 27202        | 27387      | 25356                      |
| <b>7a</b>  | 27394        | 27759      | 24792                      |
| <b>7b</b>  | 27756        | 27887      | 24977                      |
| <b>8</b>   | 27894        | 28259      | 25297                      |
| <b>N</b>   | 28274        | 29533      | 24937                      |
| <b>10</b>  | 29558        | 29674      | 25154                      |

387

388

389 **Table 2: Predictions on effect of mutations on protein stability and flexibility.** Positive and  
 390 negative  $\Delta\Delta G$  indicate an overall stabilization or destabilization effect of mutation on tertiary  
 391 architecture, respectively.  $\Delta\Delta G_{\text{vib}}$  (ENCoM) indicates vibrational entropy energy between wild  
 392 type and mutant and dictates effects of mutation on protein flexibility. Positive and negative  
 393  $\Delta\Delta G_{\text{vib}}$  indicate increase and decrease in molecule flexibility, respectively.

394

| <b>ORF</b> | <b>Mutation</b> | <b><math>\Delta\Delta G</math><br/>kcal.mol<sup>-1</sup></b> | <b><math>\Delta\Delta G_{\text{vib}}</math> (ENCoM)<br/>kcal.mol<sup>-1</sup>.K<sup>-1</sup></b> | <b>Mutation Effect</b> |
|------------|-----------------|--------------------------------------------------------------|--------------------------------------------------------------------------------------------------|------------------------|
| <b>1a</b>  | T265I           | 0.09                                                         | 0.02                                                                                             | Stabilizing            |
|            | T2016K          | -0.64                                                        | 0.43                                                                                             | Destabilizing          |
|            | L3606F          | 0.35                                                         | -0.18                                                                                            | Stabilizing            |
| <b>1b</b>  | P314L           | 0.46                                                         | -0.32                                                                                            | Stabilizing            |
| <b>3a</b>  | Q57H            | 0.07                                                         | -0.40                                                                                            | Stabilizing            |
| <b>S</b>   | D614G           | 0.25                                                         | 0.20                                                                                             | Stabilizing            |
| <b>6</b>   | I33T            | -0.04                                                        | 0.58                                                                                             | Destabilizing          |
| <b>8</b>   | L84S            | -0.345                                                       | 0.03                                                                                             | Destabilising          |
| <b>N</b>   | P13L            | 2.25                                                         | -1.16                                                                                            | Stabilizing            |
|            | S197L           | 0.382                                                        | 0.05                                                                                             | Stabilizing            |
|            | R203K           | -0.25                                                        | 0.47                                                                                             | Destabilizing          |
|            | G204R           | 0.23                                                         | -1.19                                                                                            | Stabilizing            |
|            | I292T           | -1.99                                                        | 0.77                                                                                             | Destabilizing          |

395

396

397

398

399

400

401

402

403

404

405

406

407

408

409

410

411

412

413



414  
415  
416  
417  
418  
419  
420  
421  
422  
423  
424  
425  
426  
427  
428  
429  
430  
431  
432
